# Supplementary material for: Impact of the Stringent Stress Response on the Expression of Methicillin Resistance in Staphylococcaceae Strains Carrying mecA, mecA1 and mecC
Source: MDPI journal article supplement (doi:10.3390/antibiotics11020255), 2022-02-16
Supplement: s1 [file s1]

Table S1. H\*R derivatives MIC and Fold change determination.

| Isolate     | Highest concentration of oxacillin that does not affect growth of the main susceptible parental population (µg/ml) | MIC (µg/ml) | Fold change* |
|-------------|--------------------------------------------------------------------------------------------------------------------|-------------|--------------|
| LGA251      | 0.1                                                                                                                |             |              |
| LGA251HRC2  |                                                                                                                    | 50          | 18           |
| LGA251HRC4  |                                                                                                                    | 25          | 16           |
| LGA251HRC5  |                                                                                                                    | 25          | 16           |
| LGA251HRC9  |                                                                                                                    | 25          | 16           |
| LGA251HRC10 |                                                                                                                    | 25          | 16           |
| RUSA239     | 0.1                                                                                                                |             |              |
| RUSA239HRC2 |                                                                                                                    | 400         | 24           |
| RUSA239HRC3 |                                                                                                                    | 400         | 24           |
| RUSA239HRC4 |                                                                                                                    | 400         | 24           |
| RUSA239HRC6 |                                                                                                                    | 200         | 22           |
| RUSA239HRC8 |                                                                                                                    | 200         | 22           |
| SS37        | 1.5                                                                                                                |             |              |
| SS37HRC2    |                                                                                                                    | 800         | 18           |
| SS37HRC3    |                                                                                                                    | > 800       | > 18         |
| SS37HRC5    |                                                                                                                    | 800         | 18           |
| SS37HRC8    |                                                                                                                    | 800         | 18           |
| SS37HRC9    |                                                                                                                    | 800         | 18           |

\*Fold change between the H\*R derivative MIC and the highest concentration of oxacillin that does not affect growth of the main susceptible parental population.

Table S2. Quality assessment statistics for the assemblies generated from the sequenced genomes. Data provided by INNUCA's samples reports.

| Isolate     | Raw reads accession number | Number of contigs | Coverage | Assemblies Total length (bp) | Percentage of completion * | N50    | L50 |
|-------------|----------------------------|-------------------|----------|------------------------------|----------------------------|--------|-----|
| LGA251HRC2  | ERR7959771                 | 29                | 134.04   | 2717791                      | 98.8                       | 301466 | 4   |
| LGA251HRC4  | ERR7959772                 | 28                | 126.51   | 2717110                      | 98.8                       | 301466 | 4   |
| LGA251HRC5  | ERR7959773                 | 35                | 186.17   | 2718628                      | 98.8                       | 301466 | 4   |
| LGA251HRC9  | ERR7959774                 | 32                | 109.43   | 2717905                      | 98.8                       | 301466 | 4   |
| LGA251HRC10 | ERR7959775                 | 30                | 126.63   | 2717078                      | 98.8                       | 301466 | 4   |
| RUSA239     | ERR7959776                 | 39                | 99.63    | 2780349                      | 99                         | 347898 | 3   |
| RUSA239HRC2 | ERR7959777                 | 40                | 106.27   | 2779620                      | 99                         | 231693 | 5   |
| RUSA239HRC3 | ERR7959778                 | 36                | 114.13   | 2780561                      | 99                         | 394410 | 3   |
| RUSA239HRC4 | ERR7959779                 | 32                | 111.27   | 2780840                      | 99                         | 577863 | 2   |
| RUSA239HRC6 | ERR7959780                 | 34                | 123.81   | 2782760                      | 99.1                       | 292725 | 4   |
| RUSA239HRC8 | ERR7959781                 | 38                | 128.44   | 2781630                      | 99                         | 394410 | 3   |
| SS37        | ERR7959782                 | 66                | 93.78    | 2912294                      | 103.6                      | 175761 | 6   |
| SS37HRC2    | ERR7959783                 | 65                | 113.11   | 2912065                      | 103.6                      | 166665 | 7   |
| SS37HRC3    | ERR7959784                 | 69                | 131.02   | 2913194                      | 103.6                      | 216617 | 6   |
| SS37HRC5    | ERR7959785                 | 56                | 103.95   | 2907183                      | 103.4                      | 175756 | 6   |
| SS37HRC8    | ERR7959786                 | 58                | 92.44    | 2905912                      | 103.3                      | 174955 | 6   |
| SS37HRC9    | ERR7959787                 | 56                | 113.16   | 2912791                      | 103.6                      | 222677 | 6   |

\* LGA251 genome size (accession number NC\_017349.1), COL genome size (accession number CP000046.1) and NCTC12103 genome size (accession number LS483305.1) were used to calculate the percentage of completion of LGA251H\*R derivatives, RUSA239H\*R derivatives and SS37H\*R derivatives, respectively.

Table S3. Mann-Whitney test analysis performed to detect statistical significant differences in growth curves of the H\*R derivatives in relation to the parental strains at early exponential phase of growth time points (at 3 and at 4h).

| Reference strain | H*R derivative | Sum of ranks for the reference | Sum of ranks for the H*R derivative | Mann-Whitney U | Statistical Significant? |
|------------------|----------------|--------------------------------|-------------------------------------|----------------|--------------------------|
| LGA251           | LGA251HRC2     | 432                            | 234                                 | 63             | Yes                      |
|                  | LGA251HRC4     | 441                            | 225                                 | 54             | Yes                      |
|                  | LGA251HRC5     | 419                            | 247                                 | 76             | Yes                      |
|                  | LGA251HRC9     | 316                            | 350                                 | 145            | No                       |
|                  | LGA251HRC10    | 495                            | 171                                 | 0              | Yes                      |
| RUSA239          | RUSA239HRC2    | 480                            | 186                                 | 15             | Yes                      |
|                  | RUSA239HRC3    | 377                            | 289                                 | 118            | No                       |
|                  | RUSA239HRC4    | 417                            | 249                                 | 78             | Yes                      |
|                  | RUSA239HRC6    | 348                            | 318                                 | 147            | No                       |
| SS37             | SS37HRC2       | 439                            | 227                                 | 56             | Yes                      |
|                  | SS37HRC3       | 362                            | 304                                 | 133            | No                       |
|                  | SS37HRC5       | 434                            | 232                                 | 61             | Yes                      |
|                  | SS37HRC8       | 468                            | 198                                 | 27             | Yes                      |
|                  | SS37HRC9       | 453                            | 213                                 | 42             | Yes                      |
